# Supplementary material for: A Single-Cell Atlas of Lymphocyte Adaptive Immune Repertoires and Transcriptomes Reveals Age-Related Differences in Convalescent COVID-19 Patients
Source: PubMed Central journal article supplement (PMC8312723; doi:10.3389/fimmu.2021.701085), 2021-07-12
Supplement: DataSheet_1.pdf [file DataSheet_1.pdf]

## **Supplemental Information**

Supplemental Figures 1-9

Supplemental Tables 1-5

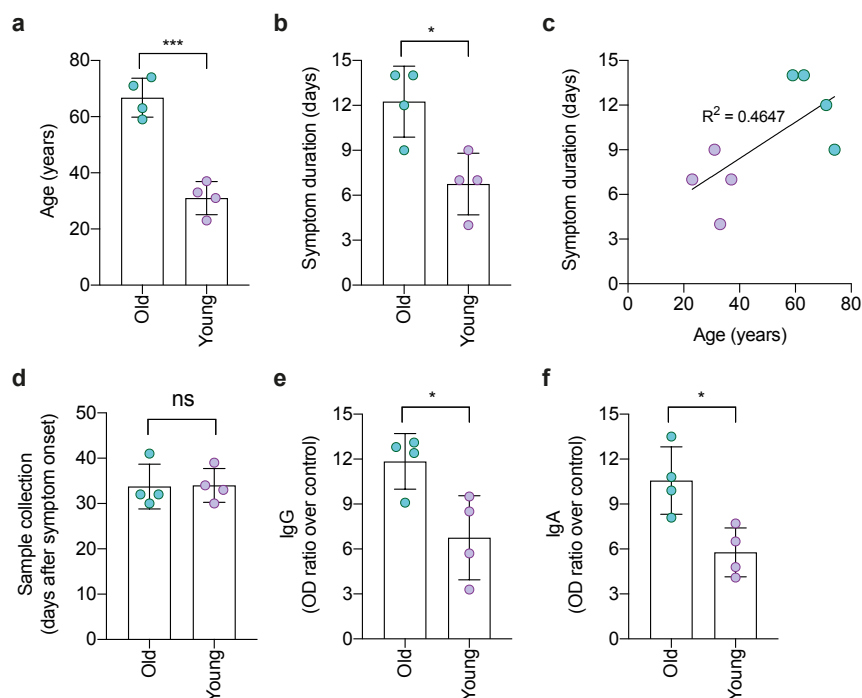

**Supplemental Figure 1. Clinical and serological characteristics of convalescent COVID-19 patients.** **a-b**, Age and COVID-19 symptom duration in patients from the old and young groups. **c**, Linear regression analysis of age and symptom duration in convalescent COVID-19 patients. **d-f**, Serological analysis of convalescent COVID-19 patients displaying time of blood collection (**d**), SARS-CoV-2-specific IgG antibody levels (**e**) and SARS-CoV-2-specific IgA antibody levels (**f**), as determined by ELISA. Data are displayed as mean  $\pm$  SD. Asterisks indicate significant differences between groups. \*  $P < 0.05$ , \*\*  $P < 0.01$ , \*\*\*  $P < 0.001$ , \*\*\*\*  $P < 0.0001$ , ns = not significant.

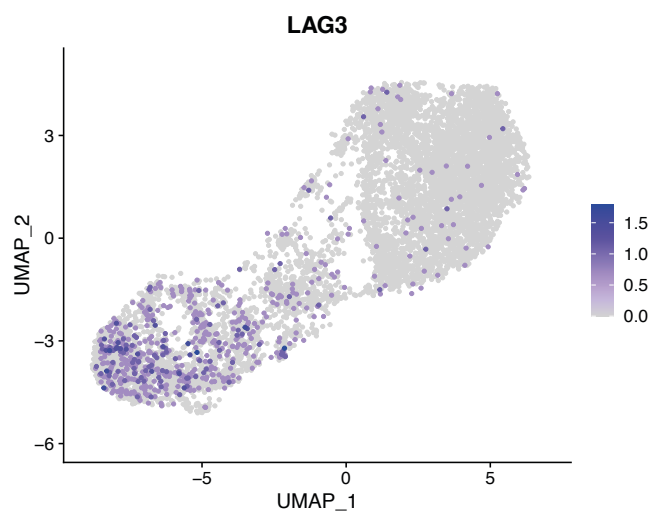

**Supplemental Figure 2. Exhausted CD8+ T cells predominantly localize to the effector CD8+ T cell region.** UMAP plot shows expression of the LAG-3 exhaustion marker by individual CD8+ T cells from all patients.

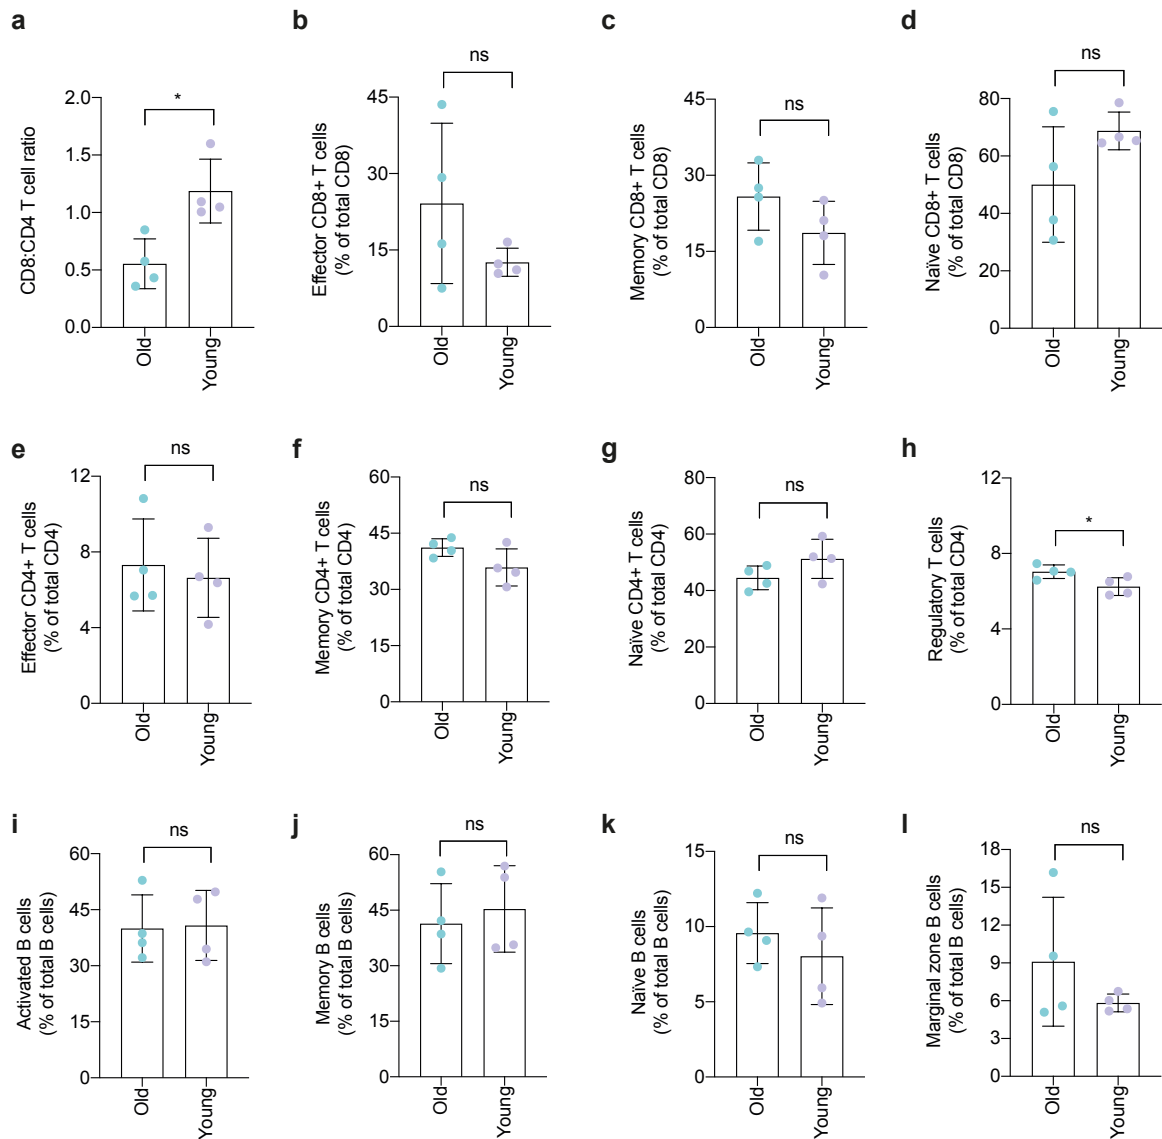

**Supplemental Figure 3. Proportions of lymphocyte subsets across studied age groups.** Bar graphs compare the proportions of T cell and B cell subsets in the old and young groups. Data are displayed as mean  $\pm$  SD. Asterisks indicate significant differences between groups. \*  $P < 0.05$ , \*\*  $P < 0.01$ , \*\*\*  $P < 0.001$ , \*\*\*\*  $P < 0.0001$ , ns = not significant.

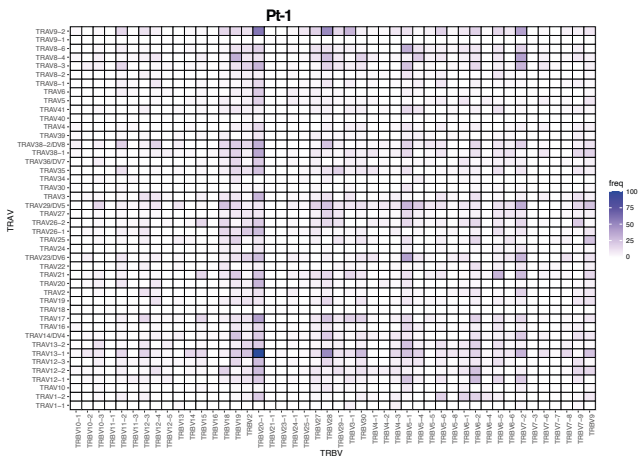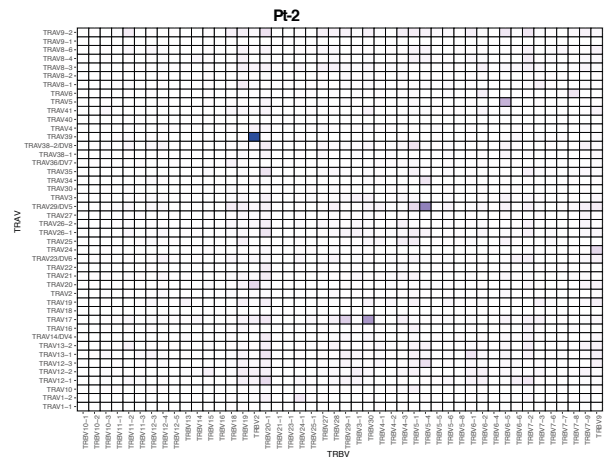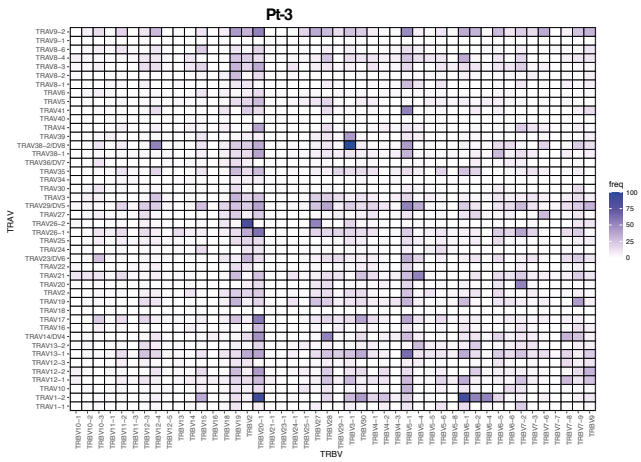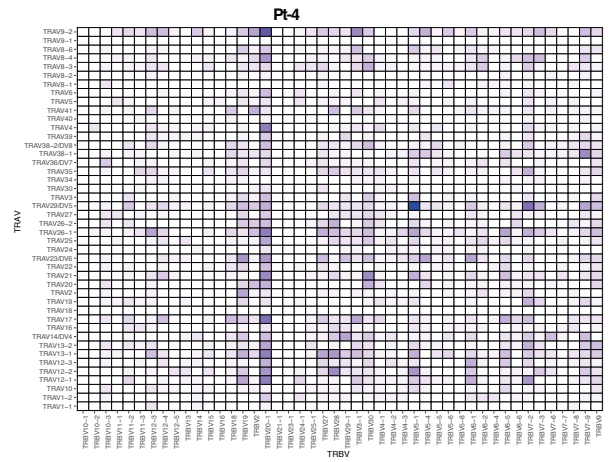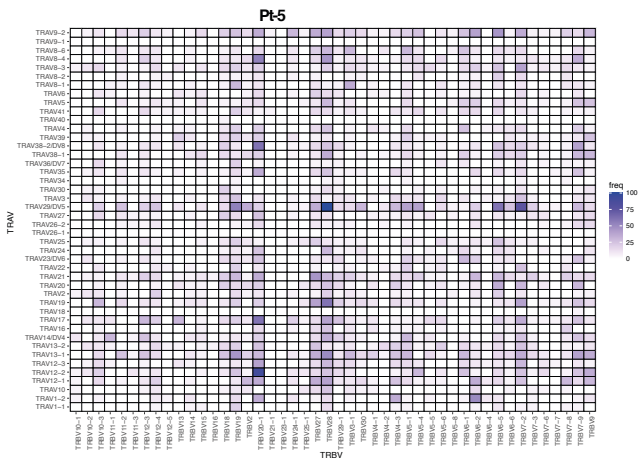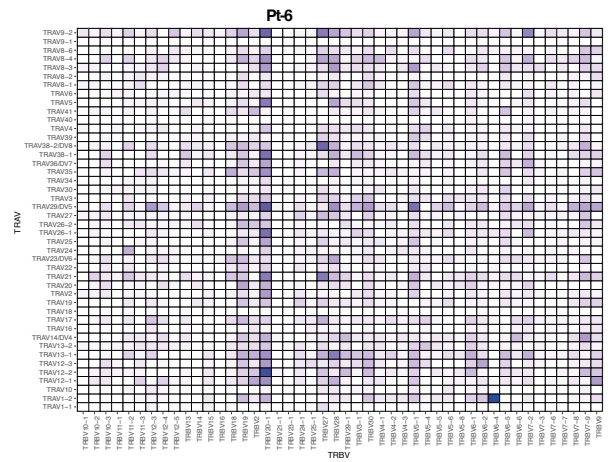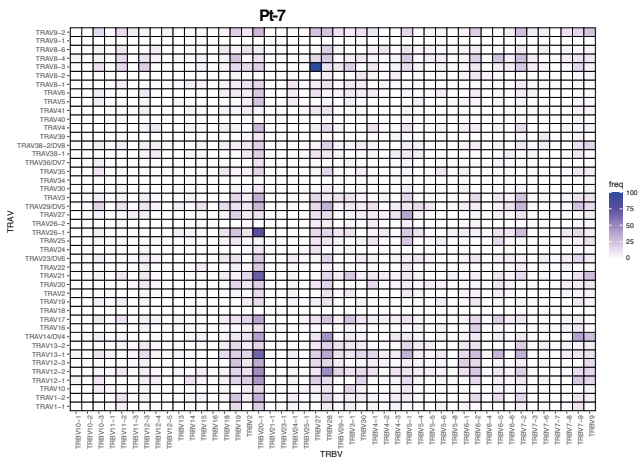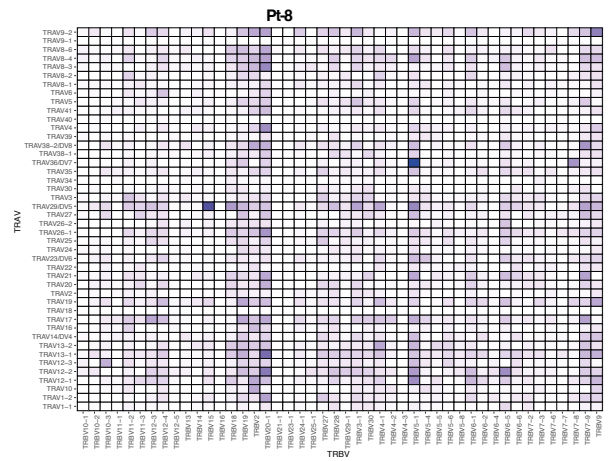

**Supplemental Figure 4. TCR V-gene pairings in convalescent COVID-19 patients.**

Heatmaps display the relative frequencies of specific TCR V-gene pairings in the T cells of individual patients. Data is normalized to the most frequent pairing found in each patient.

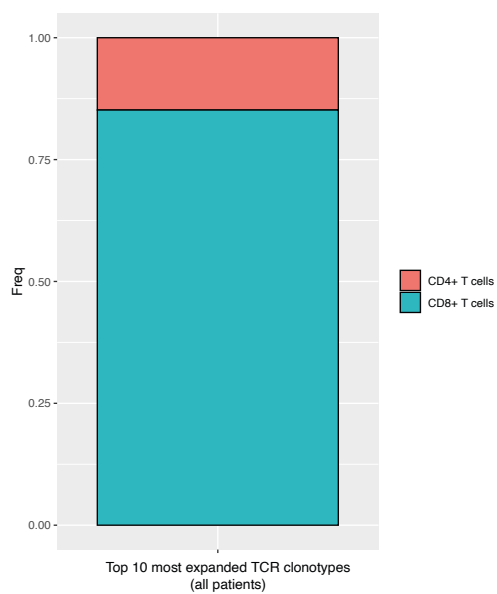

**Supplemental Figure 5. T cell clonal expansion in convalescent COVID-19 patients is dominated by CD8+ subsets.** Bar graph shows the proportions of CD8+ T cells versus CD4+ T cells within the top ten most expanded TCR clonotypes from each patient.

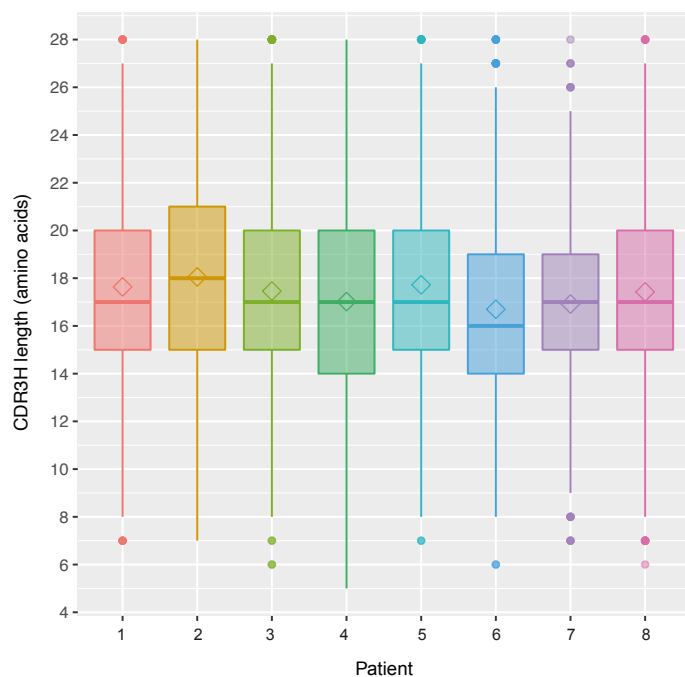

**Supplemental Figure 6. BCR heavy chain CDR3 length distribution in convalescent COVID-19 patients.**



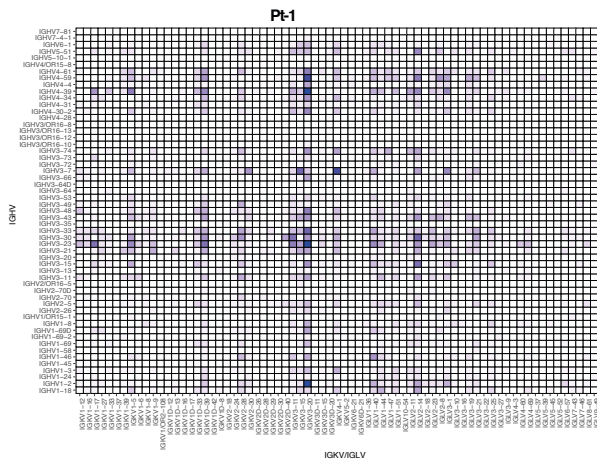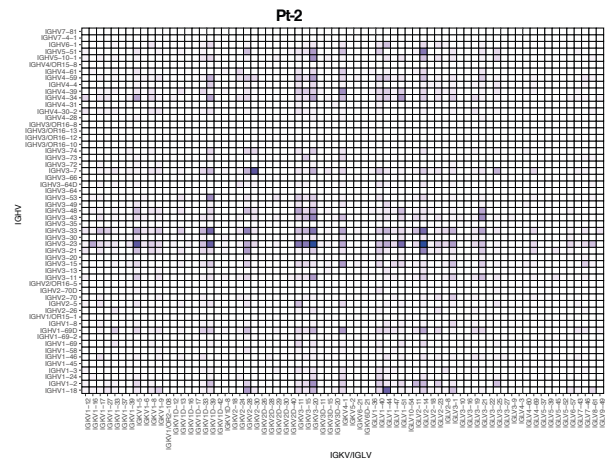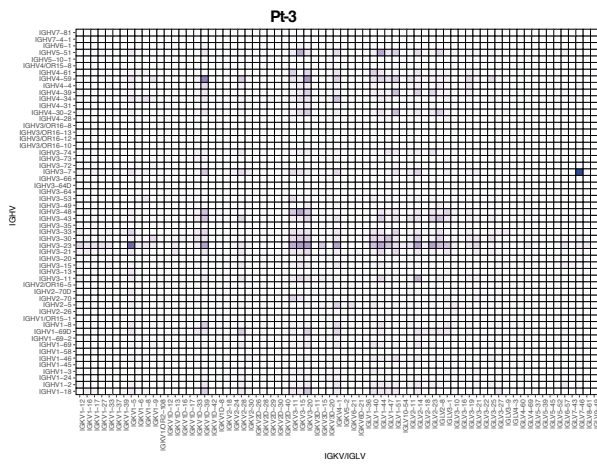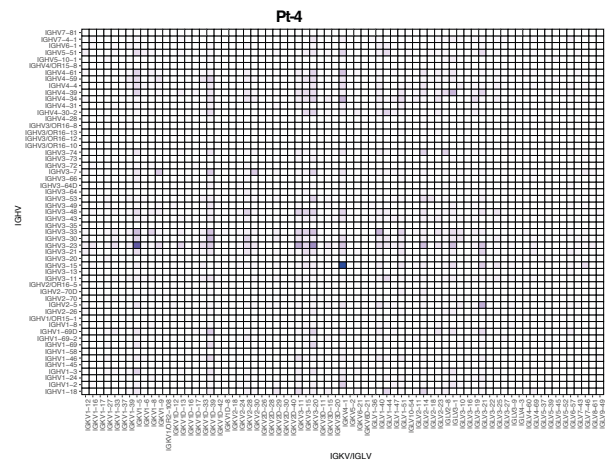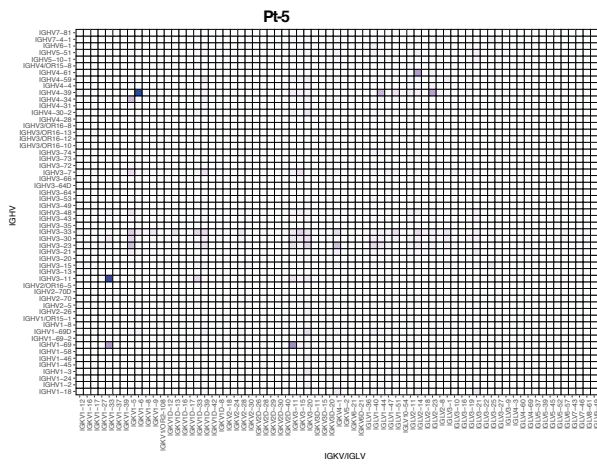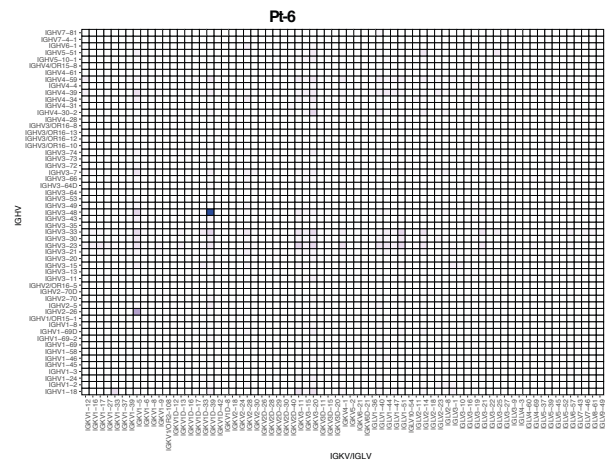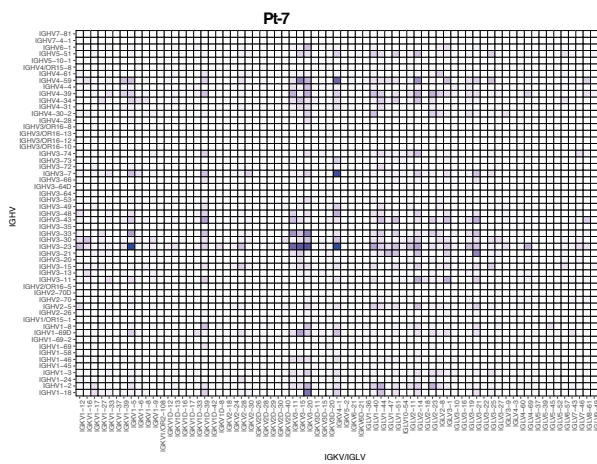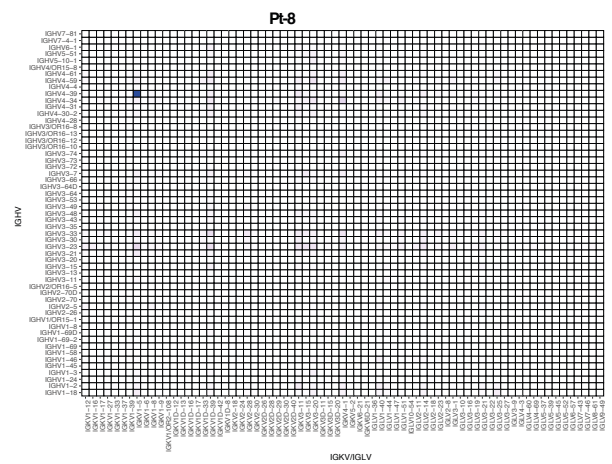

**Supplemental Figure 7. BCR V-gene pairings in convalescent COVID-19 patients.**

Heatmaps display the relative frequencies of specific BCR V-gene pairings in the B cells of individual patients. Data is normalized to the most frequent pairing found in each patient.

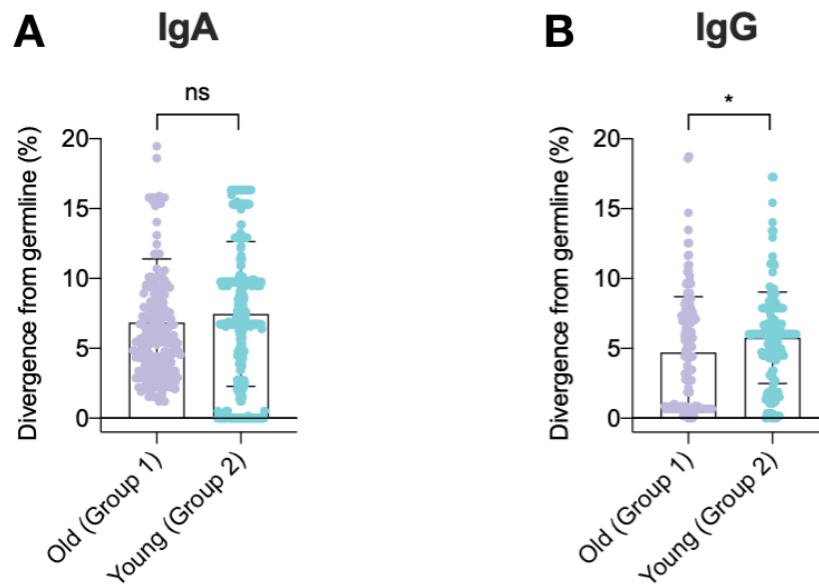

**Supplemental Figure 8. SHM levels of isotype specific clonally expanded (>1 cell) cells.** All SHM levels were calculated from cells that are part of clonotypes, which are composed of >1 cell. **a**, Boxplots display SHM levels in clonally expanded (>1) B cells that are IgG+, of old and young patients. **b**, Boxplots display SHM levels in clonally expanded (>1) B cells that are IgA+, of old and young patients. Each dot represents one cell.

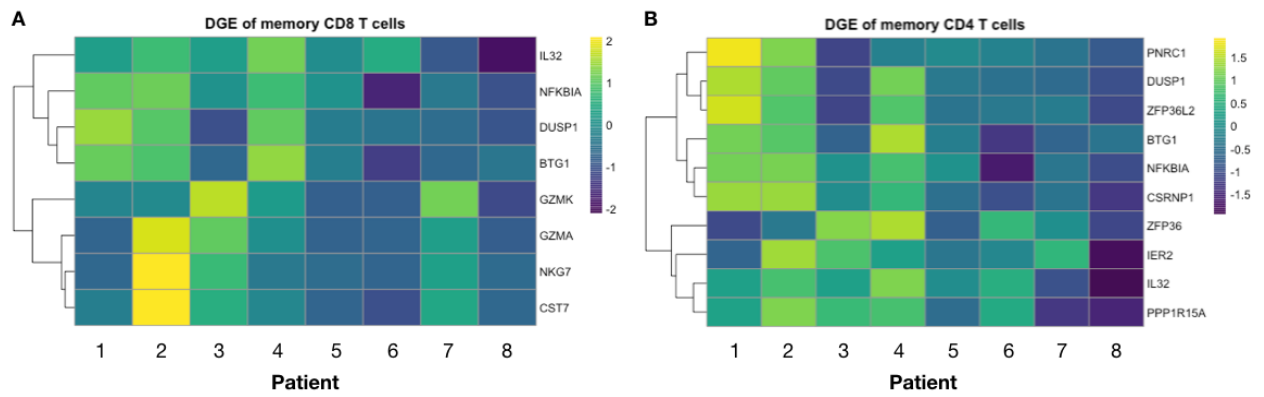

**Supplemental Figure 9. Differential gene expression analysis of memory T cells across patients.** **a**, Heatmap shows differential gene expression (DGE) of CD8+ memory T cells. **b**, Heatmap shows differential gene expression (DGE) of CD4+ memory T cells. Genes were filtered to include those with a minimum 50% fold-change in expression level between groups.

**Supplemental Table 1.** Characteristics of convalescent COVID-19 patients analyzed in this study

| Patient ID | Age | Sex | BMI<br>(kg/m <sup>2</sup> ) | RT-PCR<br>test | Days ill<br>(before PCR /<br>after PCR / total) | Restrictions    | Sample collection<br>(days after<br>symptom onset) | Rapid test<br>(LFA) | ELISA test  | IgA titer<br>(OD ratio) | IgG titer<br>(OD ratio) |
|------------|-----|-----|-----------------------------|----------------|-------------------------------------------------|-----------------|----------------------------------------------------|---------------------|-------------|-------------------------|-------------------------|
| Pt-1       | 59  | F   | 33.9                        | Positive       | 7 / 7 / 14                                      | Bedridden       | 32                                                 | IgM+ / IgG+         | IgA+ / IgG+ | 10.8                    | 13.1                    |
| Pt-2       | 63  | M   | 24.4                        | Positive       | 7 / 7 / 14                                      | Bedridden       | 41                                                 | IgM+ / IgG+         | IgA+ / IgG+ | 13.5                    | 12.8                    |
| Pt-3       | 74  | F   | 23.4                        | Positive       | 2 / 7 / 9                                       | Help needed     | 32                                                 | IgM+ / IgG+         | IgA+ / IgG+ | 8.1                     | 9.1                     |
| Pt-4)      | 71  | F   | 28.9                        | Positive       | 5 / 7 / 12                                      | Bedridden       | 30                                                 | IgM+ / IgG+         | IgA+ / IgG+ | 9.9                     | 12.4                    |
| Pt-5       | 37  | M   | 28.7                        | Positive       | 2 / 5 / 7                                       | No restrictions | 33                                                 | IgM- / IgG+         | IgA+ / IgG+ | 7.7                     | 3.3                     |
| Pt-6       | 31  | M   | 23.2                        | Positive       | 2 / 7 / 9                                       | No restrictions | 34                                                 | IgM- / IgG+         | IgA+ / IgG+ | 6.5                     | 8.5                     |
| Pt-7       | 23  | F   | 22                          | Positive       | 0 / 7 / 7                                       | No restrictions | 39                                                 | IgM+ / IgG+         | IgA+ / IgG+ | 4.8                     | 5.7                     |
| Pt-8       | 33  | M   | 26                          | Positive       | 2 / 2 / 4                                       | No restrictions | 30                                                 | IgM+ / IgG+         | IgA+ / IgG+ | 4.1                     | 9.5                     |

**Supplemental Table 2.** HLA class I alleles of studied convalescent COVID-19 patients

| Patient | HLA-A            | HLA-B            | HLA-Cw           |
|---------|------------------|------------------|------------------|
| Pt-1    | A*03:01, A*30:01 | B*13:02, B*40:02 | C*02:02, C*06:02 |
| Pt-2    | A*02:01, A*26:01 | B*38:01, B*44:02 | C*05:01, C*12:03 |
| Pt-3    | A*01:01, A*24:02 | B*07:02, B*15:29 | C*07:02, C*07:04 |
| Pt-4    | A*02:01, A*02:01 | B*15:01, B*35:01 | C*03:04, C*04:01 |
| Pt-5    | A*11:01, A*11:01 | B*18:03, B*40:01 | C*03:04, C*07:01 |
| Pt-6    | A*01:01, A*68:01 | B*07:02, B*35:03 | C*04:01, C*07:02 |
| Pt-7    | A*03:01, A*24:02 | B*18:01, B*35:02 | C*04:01, C*07:01 |
| Pt-8    | A*02:01, A*24:02 | B*13:02, B*35:02 | C*04:01, C*06:02 |

**Supplemental Table 3.** GLIPH2 analysis of patient TCRs and known HLA-A\*02:01-restricted SARS-CoV-2-specific TCRs

| Cluster | Motif | CDR3b            | TRBV     | TRBJ    | CDR3a           | TRAV     | TRAJ   | Clone | Patient |
|---------|-------|------------------|----------|---------|-----------------|----------|--------|-------|---------|
| 1       | QNTG  | CASSmaraqNTGELFF | TRBV6-6  | TRBJ2-2 | CAGSIGFGNVLHC   | TRAV25   | TRAJ35 | 1059  | Pt-02   |
| 1       | QNTG  | CASrdsqNTGELFF   | TRBV25-1 | TRBJ2-2 | CAVNSYGGSQGNLIF | TRAV12-2 | TRAJ42 | 20    | Pt-08   |
| 1       | QNTG  | CASidqNTGELFF    | TRBV5-1  | TRBJ2-2 | NA              | NA       | NA     | NA    | NA      |
| 1       | QNTG  | CASmdqNTGELFF    | TRBV2    | TRBJ2-2 | NA              | NA       | NA     | NA    | NA      |
| 1       | QNTG  | CASSYqNTGELFF    | TRBV7-8  | TRBJ2-2 | NA              | NA       | NA     | NA    | NA      |
| 1       | QNTG  | CASqdqNTGELFF    | TRBV19   | TRBJ2-2 | NA              | NA       | NA     | NA    | NA      |
| 1       | QNTG  | CASSfqNTGELFF    | TRBV7-8  | TRBJ2-2 | NA              | NA       | NA     | NA    | NA      |
| 1       | QNTG  | CAvLAeqNTGELFF   | TRBV10-2 | TRBJ2-2 | NA              | NA       | NA     | NA    | NA      |
| 1       | QNTG  | CASnnqNTGELFF    | TRBV7-8  | TRBJ2-2 | NA              | NA       | NA     | NA    | NA      |
| 1       | QNTG  | CASGtqNTGELFF    | TRBV5-1  | TRBJ2-2 | NA              | NA       | NA     | NA    | NA      |
| 1       | QNTG  | CASlsqNTGELFF    | TRBV7-8  | TRBJ2-2 | NA              | NA       | NA     | NA    | NA      |
| 1       | QNTG  | CATqvdqNTGELFF   | TRBV5-1  | TRBJ2-2 | NA              | NA       | NA     | NA    | NA      |
| 1       | QNTG  | CSVEeqNTGELFF    | TRBV29-1 | TRBJ2-2 | NA              | NA       | NA     | NA    | NA      |
| 1       | QNTG  | CARgdqNTGELFF    | TRBV7-8  | TRBJ2-2 | NA              | NA       | NA     | NA    | NA      |
| 1       | QNTG  | CASSSqNTGELFF    | TRBV7-8  | TRBJ2-2 | NA              | NA       | NA     | NA    | NA      |
| 1       | QNTG  | CASGrqNTGELFF    | TRBV5-1  | TRBJ2-2 | NA              | NA       | NA     | NA    | NA      |
| 1       | QNTG  | CAptdqNTGELFF    | TRBV12-3 | TRBJ2-2 | NA              | NA       | NA     | NA    | NA      |
| 1       | QNTG  | CASnsqNTGELFF    | TRBV12-3 | TRBJ2-2 | NA              | NA       | NA     | NA    | NA      |
| 1       | QNTG  | CASSVqNTGELFF    | TRBV7-8  | TRBJ2-2 | NA              | NA       | NA     | NA    | NA      |

Bieberich et al., Single-cell atlas of lymphocytes in COVID-19 patients

|   |      |                  |          |         |               |          |        |      |       |
|---|------|------------------|----------|---------|---------------|----------|--------|------|-------|
| 1 | QNTG | CSARdeaGQNTGELFF | TRBV20-1 | TRBJ2-2 | NA            | NA       | NA     | NA   | NA    |
| 1 | QNTG | CSARdqpGQNTGELFF | TRBV20-1 | TRBJ2-2 | NA            | NA       | NA     | NA   | NA    |
| 1 | QNTG | CSARdqaqNTGELFF  | TRBV20-1 | TRBJ2-2 | NA            | NA       | NA     | NA   | NA    |
| 1 | QNTG | CSARdLAaqNTGELFF | TRBV20-1 | TRBJ2-2 | NA            | NA       | NA     | NA   | NA    |
| 1 | QNTG | CSARdrLAqNTGELFF | TRBV20-1 | TRBJ2-2 | NA            | NA       | NA     | NA   | NA    |
| 1 | QNTG | CSARsrQGqNTGELFF | TRBV20-1 | TRBJ2-2 | NA            | NA       | NA     | NA   | NA    |
| 1 | QNTG | CSARgesdqNTGELFF | TRBV20-1 | TRBJ2-2 | NA            | NA       | NA     | NA   | NA    |
| 1 | QNTG | CASSDitrqNTGELFF | TRBV2    | TRBJ2-2 | NA            | NA       | NA     | NA   | NA    |
| 1 | QNTG | CASrsrveqNTGELFF | TRBV2    | TRBJ2-2 | NA            | NA       | NA     | NA   | NA    |
| 1 | QNTG | CSARgGLsqNTGELFF | TRBV20-1 | TRBJ2-2 | NA            | NA       | NA     | NA   | NA    |
| 1 | QNTG | CSARgGQGqNTGELFF | TRBV20-1 | TRBJ2-2 | NA            | NA       | NA     | NA   | NA    |
| 1 | QNTG | CSARdGLAqNTGELFF | TRBV20-1 | TRBJ2-2 | NA            | NA       | NA     | NA   | NA    |
| 1 | QNTG | CASrGLAeqNTGELFF | TRBV2    | TRBJ2-2 | NA            | NA       | NA     | NA   | NA    |
| 1 | QNTG | CASrdihqqNTGELFF | TRBV2    | TRBJ2-2 | NA            | NA       | NA     | NA   | NA    |
| 1 | QNTG | CSARdsraqNTGELFF | TRBV20-1 | TRBJ2-2 | NA            | NA       | NA     | NA   | NA    |
| 1 | QNTG | CSARdDRaqNTGELFF | TRBV20-1 | TRBJ2-2 | NA            | NA       | NA     | NA   | NA    |
| 1 | QNTG | CSARdaeGQNTGELFF | TRBV20-1 | TRBJ2-2 | NA            | NA       | NA     | NA   | NA    |
| 3 | DIE  | CASSLadierETQYF  | TRBV11-2 | TRBJ2-5 | CAVRDQAGTALIF | TRAV2    | TRAJ15 | 1420 | Pt-08 |
| 3 | DIE  | CASirdieiNEQFF   | TRBV28   | TRBJ2-1 | CVVFNQAGTALIF | TRAV12-1 | TRAJ15 | 2740 | Pt-08 |
| 3 | DIE  | CASSLdietYF      | TRBV7-9  | TRBJ2-7 | NA            | NA       | NA     | NA   | NA    |
| 3 | DIE  | CASSwdiEAFf      | TRBV7-9  | TRBJ1-1 | NA            | NA       | NA     | NA   | NA    |
| 3 | DIE  | CASTrdiEAFf      | TRBV7-9  | TRBJ1-1 | NA            | NA       | NA     | NA   | NA    |



|   |      |                 |          |         |                |          |        |      |       |
|---|------|-----------------|----------|---------|----------------|----------|--------|------|-------|
| 3 | DIE  | CASSVdiEAFf     | TRBV7-9  | TRBJ1-1 | NA             | NA       | NA     | NA   | NA    |
| 3 | DIE  | CASStqdiEAFf    | TRBV7-9  | TRBJ1-1 | NA             | NA       | NA     | NA   | NA    |
| 3 | DIE  | CASStdiEAFf     | TRBV7-9  | TRBJ1-1 | NA             | NA       | NA     | NA   | NA    |
| 3 | DIE  | CASSSdiEQff     | TRBV7-9  | TRBJ2-1 | NA             | NA       | NA     | NA   | NA    |
| 3 | DIE  | CASSSdiEAFf     | TRBV7-9  | TRBJ1-1 | NA             | NA       | NA     | NA   | NA    |
| 3 | DIE  | CASSDdiEAFf     | TRBV7-9  | TRBJ1-1 | NA             | NA       | NA     | NA   | NA    |
| 3 | DIE  | CASSQdiEQYf     | TRBV7-9  | TRBJ2-7 | NA             | NA       | NA     | NA   | NA    |
| 3 | DIE  | CASSQdiEAFf     | TRBV7-9  | TRBJ1-1 | NA             | NA       | NA     | NA   | NA    |
| 3 | DIE  | CASSPdiEQff     | TRBV7-9  | TRBJ2-1 | NA             | NA       | NA     | NA   | NA    |
| 3 | DIE  | CASSPdiEQYf     | TRBV7-9  | TRBJ2-7 | NA             | NA       | NA     | NA   | NA    |
| 3 | DIE  | CASSPdiEAFf     | TRBV7-9  | TRBJ1-1 | NA             | NA       | NA     | NA   | NA    |
| 3 | DIE  | CASSadiEQff     | TRBV7-9  | TRBJ2-1 | NA             | NA       | NA     | NA   | NA    |
| 3 | DIE  | CASSPdiedff     | TRBV7-9  | TRBJ1-1 | NA             | NA       | NA     | NA   | NA    |
| 3 | DIE  | CASSLdiEAFf     | TRBV7-9  | TRBJ1-1 | NA             | NA       | NA     | NA   | NA    |
| 6 | DLNT | CASkrdiNTEAFf   | TRBV5-5  | TRBJ1-1 | CAALLGPKLIF    | TRAV1-1  | TRAJ34 | 1310 | Pt-08 |
| 6 | DLNT | CASDRGdiNTGELff | TRBV19   | TRBJ2-2 | CAVRLTGgGNKLTf | TRAV12-2 | TRAJ10 | 2520 | Pt-08 |
| 6 | DLNT | CASSSdiNTGELff  | TRBV11-2 | TRBJ2-2 | CALYSGAGSYQLTf | TRAV9-2  | TRAJ28 | 2718 | Pt-08 |
| 6 | DLNT | CAItIdiNTGELff  | TRBV27   | TRBJ2-2 | NA             | NA       | NA     | NA   | NA    |
| 6 | DLNT | CAGQdiNTGELff   | TRBV7-2  | TRBJ2-2 | NA             | NA       | NA     | NA   | NA    |
| 6 | DLNT | CASSDINTGELff   | TRBV2    | TRBJ2-2 | NA             | NA       | NA     | NA   | NA    |
| 6 | DLNT | CATedINTGELff   | TRBV6-5  | TRBJ2-2 | NA             | NA       | NA     | NA   | NA    |
| 6 | DLNT | CASndINTGELff   | TRBV7-8  | TRBJ2-2 | NA             | NA       | NA     | NA   | NA    |

Bieberich et al., Single-cell atlas of lymphocytes in COVID-19 patients

|    |       |                  |          |         |                |         |        |      |       |
|----|-------|------------------|----------|---------|----------------|---------|--------|------|-------|
| 6  | DLNT  | CASndINTGELFF    | TRBV2    | TRBJ2-2 | NA             | NA      | NA     | NA   | NA    |
| 6  | DLNT  | CAIgdINTGELFF    | TRBV7-2  | TRBJ2-2 | NA             | NA      | NA     | NA   | NA    |
| 6  | DLNT  | CAppgdINTGELFF   | TRBV7-2  | TRBJ2-2 | NA             | NA      | NA     | NA   | NA    |
| 6  | DLNT  | CASqdINTGELFF    | TRBV19   | TRBJ2-2 | NA             | NA      | NA     | NA   | NA    |
| 6  | DLNT  | CASqdINTGELFF    | TRBV10-1 | TRBJ2-2 | NA             | NA      | NA     | NA   | NA    |
| 6  | DLNT  | CAIqdINTGELFF    | TRBV13   | TRBJ2-2 | NA             | NA      | NA     | NA   | NA    |
| 6  | DLNT  | CATtdINTGELFF    | TRBV15   | TRBJ2-2 | NA             | NA      | NA     | NA   | NA    |
| 6  | DLNT  | CASydINTGELFF    | TRBV5-1  | TRBJ2-2 | NA             | NA      | NA     | NA   | NA    |
| 6  | DLNT  | CATivdINTGELFF   | TRBV12-3 | TRBJ2-2 | NA             | NA      | NA     | NA   | NA    |
| 6  | DLNT  | CSAhgdiINTGELFF  | TRBV20-1 | TRBJ2-2 | NA             | NA      | NA     | NA   | NA    |
| 6  | DLNT  | CASTdiINTGELFF   | TRBV5-4  | TRBJ2-2 | NA             | NA      | NA     | NA   | NA    |
| 6  | DLNT  | CASTdiINTGELFF   | TRBV6-5  | TRBJ2-2 | NA             | NA      | NA     | NA   | NA    |
| 6  | DLNT  | CAardqrdINTGELFF | TRBV2    | TRBJ2-2 | NA             | NA      | NA     | NA   | NA    |
| 38 | SPD%E | CASSPdNEQFF      | TRBV7-6  | TRBJ2-1 | CAVQAATGRRALTF | TRAV20  | TRAJ5  | 375  | Pt-04 |
| 38 | SPD%E | CASSPdsEQYF      | TRBV7-9  | TRBJ2-7 | NA             | NA      | NA     | NA   | NA    |
| 38 | SPD%E | CASSPdiEQFF      | TRBV7-9  | TRBJ2-1 | NA             | NA      | NA     | NA   | NA    |
| 38 | SPD%E | CASSPdiEQYF      | TRBV7-9  | TRBJ2-7 | NA             | NA      | NA     | NA   | NA    |
| 38 | SPD%E | CASSPdiEAFF      | TRBV7-9  | TRBJ1-1 | NA             | NA      | NA     | NA   | NA    |
| 38 | SPD%E | CASSPdiedFF      | TRBV7-9  | TRBJ1-1 | NA             | NA      | NA     | NA   | NA    |
| 38 | SPD%E | CASSPdgeEQYF     | TRBV7-9  | TRBJ2-7 | NA             | NA      | NA     | NA   | NA    |
| 44 | SDLD  | CASSDIDRaGANVLTF | TRBV6-4  | TRBJ2-6 | CAVRDKPRLMF    | TRAV3   | TRAJ31 | 1849 | Pt-02 |
| 44 | SDLD  | CAISdIDRGiIETQYF | TRBV10-3 | TRBJ2-5 | CAVKTYGQNFVF   | TRAV8-1 | TRAJ26 | 723  | Pt-04 |

|    |         |                  |          |         |                  |          |        |      |       |
|----|---------|------------------|----------|---------|------------------|----------|--------|------|-------|
| 44 | SDLD    | CASSDldGGEAFF    | TRBV2    | TRBJ1-1 | NA               | NA       | NA     | NA   | NA    |
| 44 | SDLD    | CATSDLdsGELFF    | TRBV24-1 | TRBJ2-2 | NA               | NA       | NA     | NA   | NA    |
| 44 | SDLD    | CASSDldnlvAFF    | TRBV2    | TRBJ1-1 | NA               | NA       | NA     | NA   | NA    |
| 44 | SDLD    | CASSDldTGELFF    | TRBV2    | TRBJ2-2 | NA               | NA       | NA     | NA   | NA    |
| 48 | EQNT    | CASSQeqNTEAFF    | TRBV3-1  | TRBJ1-1 | CAVGAPGAGSYQLTF  | TRAV8-3  | TRAJ28 | 3180 | Pt-08 |
| 48 | EQNT    | CAvLAeqNTGELFF   | TRBV10-2 | TRBJ2-2 | NA               | NA       | NA     | NA   | NA    |
| 48 | EQNT    | CSVEeqNTGELFF    | TRBV29-1 | TRBJ2-2 | NA               | NA       | NA     | NA   | NA    |
| 48 | EQNT    | CASrsrveqNTGELFF | TRBV2    | TRBJ2-2 | NA               | NA       | NA     | NA   | NA    |
| 48 | EQNT    | CASrGLAeqNTGELFF | TRBV2    | TRBJ2-2 | NA               | NA       | NA     | NA   | NA    |
| 59 | DEVA    | CATSDevavGELFF   | TRBV24-1 | TRBJ2-2 | CAARRSQGNLIF     | TRAV8-6  | TRAJ42 | 2090 | Pt-08 |
| 59 | DEVA    | CASSQdevasGELFF  | TRBV4-1  | TRBJ2-2 | CAVSPAALGFGNVLHC | TRAV3    | TRAJ35 | 2652 | Pt-08 |
| 59 | DEVA    | CSARdevahNTGELFF | TRBV20-1 | TRBJ2-2 | NA               | NA       | NA     | NA   | NA    |
| 61 | SLD%E   | CASSLdwEQYF      | TRBV13   | TRBJ2-7 | CIVRHSGGYQKVTF   | TRAV26-1 | TRAJ13 | 922  | Pt-02 |
| 61 | SLD%E   | CASSLdTEAFF      | TRBV12-4 | TRBJ1-1 | CAPGWAGTALIF     | TRAV6    | TRAJ15 | 8    | Pt-08 |
| 61 | SLD%E   | CASSLdietYF      | TRBV7-9  | TRBJ2-7 | NA               | NA       | NA     | NA   | NA    |
| 61 | SLD%E   | CASSLdsEQFF      | TRBV7-9  | TRBJ2-1 | NA               | NA       | NA     | NA   | NA    |
| 61 | SLD%E   | CASSLdvEQYF      | TRBV7-9  | TRBJ2-7 | NA               | NA       | NA     | NA   | NA    |
| 61 | SLD%E   | CASSLdiEAFF      | TRBV7-9  | TRBJ1-1 | NA               | NA       | NA     | NA   | NA    |
| 79 | S%ANTGE | CASSYaNTGELFF    | TRBV5-4  | TRBJ2-2 | CAVGVDSNYQLIW    | TRAV39   | TRAJ33 | 1104 | Pt-04 |
| 79 | S%ANTGE | CASSEaNTGELFF    | TRBV7-9  | TRBJ2-2 | NA               | NA       | NA     | NA   | NA    |
| 79 | S%ANTGE | CASSDaNTGELFF    | TRBV5-1  | TRBJ2-2 | NA               | NA       | NA     | NA   | NA    |
| 79 | S%ANTGE | CASSnaNTGELFF    | TRBV7-9  | TRBJ2-2 | NA               | NA       | NA     | NA   | NA    |

|     |            |                   |          |         |                   |          |        |      |       |
|-----|------------|-------------------|----------|---------|-------------------|----------|--------|------|-------|
| 82  | S%GTGHQP   | CATSkGTGhQPQHF    | TRBV15   | TRBJ1-5 | CVVRGSNDYKLSF     | TRAV12-1 | TRAJ20 | 827  | Pt-08 |
| 82  | S%GTGHQP   | CATSGtGTGhQPQHF   | TRBV24-1 | TRBJ1-5 | NA                | NA       | NA     | NA   | NA    |
| 82  | S%GTGHQP   | CASSLGTGhQPQHF    | TRBV27   | TRBJ1-5 | NA                | NA       | NA     | NA   | NA    |
| 98  | SIIG       | CASSligNQPQHF     | TRBV19   | TRBJ1-5 | CILNSGGSNYKLTf    | TRAV26-2 | TRAJ53 | 949  | Pt-02 |
| 98  | SIIG       | CASSQsiigGTETQYF  | TRBV16   | TRBJ2-5 | CAEKGDKIIF        | TRAV5    | TRAJ30 | 547  | Pt-04 |
| 98  | SIIG       | CASSIIGGgNTGELFF  | TRBV19   | TRBJ2-2 | NA                | NA       | NA     | NA   | NA    |
| 102 | SKGN       | CASSYskgNQPQHF    | TRBV6-6  | TRBJ1-5 | CILSRNFGNEKLTf    | TRAV26-2 | TRAJ48 | 1621 | Pt-04 |
| 102 | SKGN       | CAISEskGNTIYF     | TRBV10-3 | TRBJ1-3 | CVVSADNYGQNFVF    | TRAV10   | TRAJ26 | 1445 | Pt-08 |
| 102 | SKGN       | CSARdskngwNTGELFF | TRBV20-1 | TRBJ2-2 | NA                | NA       | NA     | NA   | NA    |
| 166 | SLGTG%D    | CASSLGTGdddTF     | TRBV7-9  | TRBJ1-2 | CALLGDSNYQLIW     | TRAV16   | TRAJ33 | 418  | Pt-08 |
| 166 | SLGTG%D    | CASSLGTGGdLHF     | TRBV7-9  | TRBJ1-6 | NA                | NA       | NA     | NA   | NA    |
| 181 | SDGTS%E    | CAISdGTSYEQYF     | TRBV10-3 | TRBJ2-7 | CAGPGVSSGGSNYKLTf | TRAV25   | TRAJ53 | 3305 | Pt-08 |
| 181 | SDGTS%E    | CASSDGTsnEQYF     | TRBV5-1  | TRBJ2-7 | NA                | NA       | NA     | NA   | NA    |
| 192 | SGGTG%QP   | CASSgGTGGQPQHF    | TRBV2    | TRBJ1-5 | CVVNSDYGQNFVF     | TRAV12-1 | TRAJ26 | 1429 | Pt-08 |
| 192 | SGGTG%QP   | CATSGtGTGhQPQHF   | TRBV24-1 | TRBJ1-5 | NA                | NA       | NA     | NA   | NA    |
| 202 | SFLAGG%TGE | CASSfLAGGqTGELFF  | TRBV5-6  | TRBJ2-2 | CAVNKNTGGFKTIF    | TRAV8-1  | TRAJ9  | 1869 | Pt-08 |
| 202 | SFLAGG%TGE | CASSfLAGGNTGELFF  | TRBV19   | TRBJ2-2 | NA                | NA       | NA     | NA   | NA    |
| 247 | SD%YG      | CASSDdYGYTF       | TRBV5-1  | TRBJ1-2 | CAVNAQGNRLAF      | TRAV8-1  | TRAJ7  | 1898 | Pt-02 |
| 247 | SD%YG      | CASSDsYGYTF       | TRBV7-8  | TRBJ1-2 | NA                | NA       | NA     | NA   | NA    |
| 259 | SY%NTGE    | CASSYaNTGELFF     | TRBV5-4  | TRBJ2-2 | CAVGVDSNYQLIW     | TRAV39   | TRAJ33 | 1104 | Pt-04 |
| 259 | SY%NTGE    | CASSYqNTGELFF     | TRBV7-8  | TRBJ2-2 | NA                | NA       | NA     | NA   | NA    |
| 279 | %YANTGE    | CASSYaNTGELFF     | TRBV5-4  | TRBJ2-2 | CAVGVDSNYQLIW     | TRAV39   | TRAJ33 | 1104 | Pt-04 |

## Bieberich et al., Single-cell atlas of lymphocytes in COVID-19 patients

|     |            |                  |          |         |                    |            |        |      |       |
|-----|------------|------------------|----------|---------|--------------------|------------|--------|------|-------|
| 279 | %YANTGE    | CAIqyaNTGELFF    | TRBV15   | TRBJ2-2 | NA                 | NA         | NA     | NA   | NA    |
| 284 | QQAN       | CASSQqaNTEAFF    | TRBV3-1  | TRBJ1-1 | CAVITYTGANSKLTF    | TRAV8-6    | TRAJ56 | 3280 | Pt-08 |
| 284 | QQAN       | CASqqaNTGELFF    | TRBV19   | TRBJ2-2 | NA                 | NA         | NA     | NA   | NA    |
| 285 | S%TNTGE    | CASSGTNTGELFF    | TRBV6-5  | TRBJ2-2 | CAASSSGTYKYIF      | TRAV29/DV5 | TRAJ40 | 782  | Pt-02 |
| 285 | S%TNTGE    | CASSDINTGELFF    | TRBV5-1  | TRBJ2-2 | NA                 | NA         | NA     | NA   | NA    |
| 285 | S%TNTGE    | CASShtNTGELFF    | TRBV9    | TRBJ2-2 | NA                 | NA         | NA     | NA   | NA    |
| 288 | DLNS       | CAGGgdlnSGNTIYF  | TRBV12-3 | TRBJ1-3 | CVGNsgYALNF        | TRAV12-1   | TRAJ41 | 480  | Pt-08 |
| 288 | DLNS       | CASSDlnSGEQYF    | TRBV2    | TRBJ2-7 | NA                 | NA         | NA     | NA   | NA    |
| 288 | DLNS       | CATmddlnsGELFF   | TRBV2    | TRBJ2-2 | NA                 | NA         | NA     | NA   | NA    |
| 302 | %TENTGE    | CAItteNTGELFF    | TRBV30   | TRBJ2-2 | CVVNKITGTASKLTF    | TRAV12-1   | TRAJ44 | 3701 | Pt-08 |
| 302 | %TENTGE    | CATSteNTGELFF    | TRBV15   | TRBJ2-2 | NA                 | NA         | NA     | NA   | NA    |
| 385 | SPLAGG%TGE | CASSPLAGGiTGELFF | TRBV13   | TRBJ2-2 | CAMREGGNSGGsNYKLTF | TRAV14/DV4 | TRAJ53 | 1808 | Pt-08 |
| 385 | SPLAGG%TGE | CASSPLAGGNTGELFF | TRBV3-1  | TRBJ2-2 | NA                 | NA         | NA     | NA   | NA    |
| 385 | SPLAGG%TGE | CASSPLAGGNTGELFF | TRBV4-3  | TRBJ2-2 | NA                 | NA         | NA     | NA   | NA    |
| 428 | %GTNTGE    | CASSGTNTGELFF    | TRBV6-5  | TRBJ2-2 | CAASSSGTYKYIF      | TRAV29/DV5 | TRAJ40 | 782  | Pt-02 |
| 428 | %GTNTGE    | CASGGTNTGELFF    | TRBV2    | TRBJ2-2 | NA                 | NA         | NA     | NA   | NA    |
| 533 | SPDS%      | CASSPdSPLHF      | TRBV6-6  | TRBJ1-6 | CALSEARNFNKFYF     | TRAV19     | TRAJ21 | 3176 | Pt-08 |
| 533 | SPDS%      | CASSPdsEQYF      | TRBV7-9  | TRBJ2-7 | NA                 | NA         | NA     | NA   | NA    |
| 540 | S%GTSNE    | CASSfGTSNEQFF    | TRBV27   | TRBJ2-1 | CAETLAGGSTLGRLYF   | TRAV5      | TRAJ18 | 448  | Pt-08 |
| 540 | S%GTSNE    | CASSDGTsnEQYF    | TRBV5-1  | TRBJ2-7 | NA                 | NA         | NA     | NA   | NA    |
| 580 | SL%VE      | CSgslgvEQYF      | TRBV20-1 | TRBJ2-7 | CAVNFYnQGgKLIF     | TRAV8-1    | TRAJ23 | 610  | Pt-08 |
| 580 | SL%VE      | CASSLdvEQYF      | TRBV7-9  | TRBJ2-7 | NA                 | NA         | NA     | NA   | NA    |

|     |         |               |         |         |               |            |        |      |       |
|-----|---------|---------------|---------|---------|---------------|------------|--------|------|-------|
| 618 | RD%DT   | CASrdaDTQYF   | TRBV5-5 | TRBJ2-3 | CVVNTGFQKLVF  | TRAV12-1   | TRAJ8  | 2922 | Pt-08 |
| 618 | RD%DT   | CANrdTDTQYF   | TRBV3-1 | TRBJ2-3 | NA            | NA         | NA     | NA   | NA    |
| 664 | SG%NTGE | CASSGTNTGELFF | TRBV6-5 | TRBJ2-2 | CAASSSGTYKYIF | TRAV29/DV5 | TRAJ40 | 782  | Pt-02 |
| 664 | SG%NTGE | CASSGLNTGELFF | TRBV5-1 | TRBJ2-2 | NA            | NA         | NA     | NA   | NA    |

**Supplemental Table 4.** GLIPH2 analysis of patient TCRs and known HLA-A\*02:01-restricted CMV- and EBV-specific TCRs

| Specificity group | Motif   | CDR3b              | TRBV     | TRBJ    | CDR3a             | TRAV       | TRAJ   | Patient             |
|-------------------|---------|--------------------|----------|---------|-------------------|------------|--------|---------------------|
| 15                | SSA%YG  | CASSSASYGYTF       | TRBV19   | TRBJ1-2 | NA                | NA         | NA     | NLVPMVATV_pp65_CMV  |
| 15                | SSA%YG  | CASSSANYGYTF       | TRBV12-4 | TRBJ1-2 | CAGPMKTSYDKVIF    | TRAV35     | TRAJ50 | Pt-08               |
| 15                | SSA%YG  | CASSSANYGYTF       | TRBV12-4 | TRBJ1-2 | NA                | NA         | NA     | NLVPMVATV_pp65_CMV  |
| 15                | SSA%YG  | CASSSANYGYTF       | TRBV19   | TRBJ1-2 | NA                | NA         | NA     | NLVPMVATV_pp65_CMV  |
| 15                | SSA%YG  | CASSSANYGYTF       | TRBV12-3 | TRBJ1-2 | NA                | NA         | NA     | NLVPMVATV_pp65_CMV  |
| 15                | SSA%YG  | CASSSANYGYTF       | TRBV11-1 | TRBJ1-2 | NA                | NA         | NA     | NLVPMVATV_pp65_CMV  |
| 15                | SSA%YG  | CASSSAYGYTF        | TRBV12-4 | TRBJ1-2 | NA                | NA         | NA     | NLVPMVATV_pp65_CMV  |
| 15                | SSA%YG  | CASSSATYGYTF       | TRBV19   | TRBJ1-2 | NA                | NA         | NA     | NLVPMVATV_pp65_CMV  |
| 15                | SSA%YG  | CASSSAHYGYTF       | TRBV11-1 | TRBJ1-2 | NA                | NA         | NA     | NLVPMVATV_pp65_CMV  |
| 15                | SSA%YG  | CASSSAFYGYTF       | TRBV19   | TRBJ1-2 | NA                | NA         | NA     | NLVPMVATV_pp65_CMV  |
| 15                | SSA%YG  | CASSSAFYGYTF       | TRBV11-1 | TRBJ1-2 | NA                | NA         | NA     | NLVPMVATV_pp65_CMV  |
| 64                | GQAW    | CASSSPVQQAQWVYGYTF | TRBV28   | TRBJ1-2 | CAVRPADRGSTLGRLYF | TRAV1-2    | TRAJ18 | Pt-08               |
| 64                | GQAW    | CAISDPPGQAWGSPLHF  | TRBV10-3 | TRBJ1-6 | CAARYGGATNKLIF    | TRAV29/DV5 | TRAJ32 | Pt-08               |
| 64                | GQAW    | CASSFGQAWETQYF     | TRBV7-9  | TRBJ2-5 | NA                | NA         | NA     | NLVPMVATV_pp65_CMV  |
| 64                | GQAW    | CASSFGQAWYEQYF     | TRBV7-9  | TRBJ2-7 | NA                | NA         | NA     | NLVPMVATV_pp65_CMV  |
| 87                | R%GVGNT | CSARTGVGNTIYF      | TRBV20-1 | TRBJ1-3 | NA                | NA         | NA     | GLCTLVAML_BMLF1_EBV |
| 87                | R%GVGNT | CSARSGVGNTIYF      | TRBV20-1 | TRBJ1-3 | NA                | NA         | NA     | GLCTLVAML_BMLF1_EBV |
| 87                | R%GVGNT | CSARVGVGNTIYF      | TRBV20-1 | TRBJ1-3 | NA                | NA         | NA     | GLCTLVAML_BMLF1_EBV |

|     |            |                   |          |         |                  |            |        |                     |
|-----|------------|-------------------|----------|---------|------------------|------------|--------|---------------------|
| 87  | R%GVGNT    | CASREGVGN TIYF    | TRBV6-5  | TRBJ1-3 | CAMGGSEKLVF      | TRAV29/DV5 | TRAJ57 | Pt-08               |
| 109 | SL%LENE    | CASSLGLENEQFF     | TRBV7-8  | TRBJ2-1 | NA               | NA         | NA     | GLCTLVAML_BMLF1_EBV |
| 109 | SL%LENE    | CASSLTLENEQFF     | TRBV7-3  | TRBJ2-1 | CAAKTGANNLFF     | TRAV29/DV5 | TRAJ36 | Pt-04               |
| 187 | QRGF       | CASRSAQRGFTETQYF  | TRBV28   | TRBJ2-5 | NA               | NA         | NA     | NLVPMVATV_pp65_CMV  |
| 187 | QRGF       | CASSPSTQRGFTAFAFF | TRBV7-2  | TRBJ1-1 | CARNKGGTGFKLVF   | TRAV6      | TRAJ8  | Pt-02               |
| 198 | SFGQA%YE   | CASSFGQAWYEQYF    | TRBV7-9  | TRBJ2-7 | NA               | NA         | NA     | NLVPMVATV_pp65_CMV  |
| 198 | SFGQA%YE   | CASSFGQAHYEQYF    | TRBV5-1  | TRBJ2-7 | CARLPWRDNYGQNFVF | TRAV12-3   | TRAJ26 | Pt-08               |
| 204 | SLA%GATNEK | CASSLAPGATNEKLFF  | TRBV7-6  | TRBJ1-4 | NA               | NA         | NA     | NLVPMVATV_pp65_CMV  |
| 204 | SLA%GATNEK | CASSLAPGATNEKLFF  | TRBV11-1 | TRBJ1-4 | NA               | NA         | NA     | NLVPMVATV_pp65_CMV  |
| 204 | SLA%GATNEK | CASSLAPGATNEKLFF  | TRBV7-9  | TRBJ1-4 | NA               | NA         | NA     | NLVPMVATV_pp65_CMV  |
| 204 | SLA%GATNEK | CASSLAGGATNEKLFF  | TRBV5-1  | TRBJ1-4 | CAAKSGAGSYQLTF   | TRAV29/DV5 | TRAJ28 | Pt-04               |
| 225 | SLTTG%     | CASSLTTGGYTF      | TRBV19   | TRBJ1-2 | CAVGYDMRF        | TRAV22     | TRAJ43 | Pt-04               |
| 225 | SLTTG%     | CASSLTTGIQYF      | TRBV6-2  | TRBJ2-4 | NA               | NA         | NA     | YVLDHLIVV_BRLF1_EBV |
| 239 | S%LLAGYNE  | CASSLLLAGYNEQFF   | TRBV11-2 | TRBJ2-1 | NA               | NA         | NA     | NLVPMVATV_pp65_CMV  |
| 239 | S%LLAGYNE  | CASSQLLAGYNEQFF   | TRBV4-3  | TRBJ2-1 | CAASSLGGGSNYKLTF | TRAV23/DV6 | TRAJ53 | Pt-04               |
| 292 | SQ%PGGE    | CASSQDPGGEQYF     | TRBV4-3  | TRBJ2-7 | CAENGGTSYGKLTFF  | TRAV13-2   | TRAJ52 | Pt-02               |
| 292 | SQ%PGGE    | CASSQSPGGEQYF     | TRBV14   | TRBJ2-7 | NA               | NA         | NA     | GLCTLVAML_BMLF1_EBV |
| 346 | SLL%SNQP   | CASSLLVSNQPQHF    | TRBV2    | TRBJ1-5 | CAIVRDDKIIF      | TRAV17     | TRAJ30 | Pt-04               |
| 346 | SLL%SNQP   | CASSLLGSNQPQHF    | TRBV27   | TRBJ1-5 | CAVLPQGGSEKLVF   | TRAV36/DV7 | TRAJ57 | Pt-04               |
| 346 | SLL%SNQP   | CASSLLGSNQPQHF    | TRBV7-8  | TRBJ1-5 | NA               | NA         | NA     | GLCTLVAML_BMLF1_EBV |
| 372 | SLY%DT     | CASSLYPDTQYF      | TRBV27   | TRBJ2-3 | CAARYSGGGADGLTF  | TRAV13-1   | TRAJ45 | Pt-04               |
| 372 | SLY%DT     | CASSLYSDTQYF      | TRBV28   | TRBJ2-3 | NA               | NA         | NA     | YVLDHLIVV_BRLF1_EBV |



## Bieberich et al., Single-cell atlas of lymphocytes in COVID-19 patients

|     |          |                |          |         |                 |            |        |                     |
|-----|----------|----------------|----------|---------|-----------------|------------|--------|---------------------|
| 433 | SPGT%KET | CASSPGTDKETQYF | TRBV5-1  | TRBJ2-5 | CAVNRPGGGNKLTF  | TRAV12-2   | TRAJ10 | Pt-08               |
| 433 | SPGT%KET | CASSPGLKETQYF  | TRBV12-3 | TRBJ2-5 | NA              | NA         | NA     | NLVPMVATV_pp65_CMV  |
| 441 | S%VGGYE  | CASSLVGGYEQYF  | TRBV5-4  | TRBJ2-7 | CAIRRGGGTSYGKLT | TRAV13-1   | TRAJ52 | Pt-08               |
| 441 | S%VGGYE  | CASSHVGGYEQYF  | TRBV4-1  | TRBJ2-7 | NA              | NA         | NA     | GLCTLVAML_BMLF1_EBV |
| 472 | SL%GSNQP | CASSLQGSNQPQHF | TRBV6-2  | TRBJ1-5 | NA              | NA         | NA     | YVLDHLIVV_BRLF1_EBV |
| 472 | SL%GSNQP | CASSLEGSNQPQHF | TRBV7-8  | TRBJ1-5 | CDNAGNMLTF      | TRAV27     | TRAJ39 | Pt-08               |
| 472 | SL%GSNQP | CASSLLGSNQPQHF | TRBV27   | TRBJ1-5 | CAVLPQGGSEKLVF  | TRAV36/DV7 | TRAJ57 | Pt-04               |
| 472 | SL%GSNQP | CASSLLGSNQPQHF | TRBV7-8  | TRBJ1-5 | NA              | NA         | NA     | GLCTLVAML_BMLF1_EBV |
| 501 | SLG%ENE  | CASSLGLENEQFF  | TRBV7-8  | TRBJ2-1 | NA              | NA         | NA     | GLCTLVAML_BMLF1_EBV |
| 501 | SLG%ENE  | CASSLGEENEQFF  | TRBV7-9  | TRBJ2-1 | CAESIFYNAGNMLTF | TRAV5      | TRAJ39 | Pt-08               |
| 568 | S%QGSNQP | CASSPQGSNQPQHF | TRBV18   | TRBJ1-5 | CAASAGNAGKSTF   | TRAV29/DV5 | TRAJ27 | Pt-08               |
| 568 | S%QGSNQP | CASSLQGSNQPQHF | TRBV6-2  | TRBJ1-5 | NA              | NA         | NA     | YVLDHLIVV_BRLF1_EBV |
| 592 | S%TGTYE  | CATSWTGTYEQYF  | TRBV15   | TRBJ2-7 | NA              | NA         | NA     | YVLDHLIVV_BRLF1_EBV |
| 592 | S%TGTYE  | CASSLTGTYEQYF  | TRBV11-2 | TRBJ2-7 | CAERMAGNMLTF    | TRAV13-2   | TRAJ39 | Pt-04               |
| 592 | S%TGTYE  | CASSLTGTYEQYF  | TRBV4-1  | TRBJ2-7 | CVILTGNQFYF     | TRAV29/DV5 | TRAJ49 | Pt-08               |
| 595 | S%GQQET  | CASSYGQQETQYF  | TRBV6-5  | TRBJ2-5 | CAVRAPGGKLIF    | TRAV1-1    | TRAJ23 | Pt-08               |
| 595 | S%GQQET  | CASSFGQQETQYF  | TRBV12-4 | TRBJ2-5 | NA              | NA         | NA     | GLCTLVAML_BMLF1_EBV |
| 600 | SG%GGTDT | CASSGVGGTDTQYF | TRBV9    | TRBJ2-3 | NA              | NA         | NA     | NLVPMVATV_pp65_CMV  |
| 600 | SG%GGTDT | CATSGGGTDTQYF  | TRBV24-1 | TRBJ2-3 | CAGDDAGGTSYGKLT | TRAV27     | TRAJ52 | Pt-02               |
| 647 | SRGA%E   | CAWSRGAVEQFF   | TRBV30   | TRBJ2-1 | NA              | NA         | NA     | GLCTLVAML_BMLF1_EBV |
| 647 | SRGA%E   | CASSRGAYEQYF   | TRBV14   | TRBJ2-7 | CATYGGATNKLIF   | TRAV14/DV4 | TRAJ32 | Pt-04               |
| 648 | SL%GYTE  | CASSLGGYTEAFF  | TRBV7-2  | TRBJ1-1 | CALSGRSGGYQKVTF | TRAV16     | TRAJ13 | Pt-02               |

|     |         |               |          |         |                |          |        |                     |
|-----|---------|---------------|----------|---------|----------------|----------|--------|---------------------|
| 648 | SL%GYTE | CASSLEGYTEAFF | TRBV11-2 | TRBJ1-1 | NA             | NA       | NA     | NLVPMVATV_pp65_CMV  |
| 648 | SL%GYTE | CASSLEGYTEAFF | TRBV27   | TRBJ1-1 | NA             | NA       | NA     | NLVPMVATV_pp65_CMV  |
| 680 | S%ANYG  | CASSFANYGYTF  | TRBV19   | TRBJ1-2 | NA             | NA       | NA     | NLVPMVATV_pp65_CMV  |
| 680 | S%ANYG  | CASSSANYGYTF  | TRBV12-4 | TRBJ1-2 | CAGPMKTSYDKVIF | TRAV35   | TRAJ50 | Pt-08               |
| 680 | S%ANYG  | CASSSANYGYTF  | TRBV12-4 | TRBJ1-2 | NA             | NA       | NA     | NLVPMVATV_pp65_CMV  |
| 680 | S%ANYG  | CASSSANYGYTF  | TRBV19   | TRBJ1-2 | NA             | NA       | NA     | NLVPMVATV_pp65_CMV  |
| 680 | S%ANYG  | CASSSANYGYTF  | TRBV12-3 | TRBJ1-2 | NA             | NA       | NA     | NLVPMVATV_pp65_CMV  |
| 680 | S%ANYG  | CASSSANYGYTF  | TRBV11-1 | TRBJ1-2 | NA             | NA       | NA     | NLVPMVATV_pp65_CMV  |
| 689 | S%GNTE  | CASSLGNTEAFF  | TRBV12-3 | TRBJ1-1 | CAVREGYSTLTF   | TRAV1-1  | TRAJ11 | Pt-08               |
| 689 | S%GNTE  | CASSLGNTEAFF  | TRBV6-2  | TRBJ1-1 | NA             | NA       | NA     | GLCTLVAML_BMLF1_EBV |
| 689 | S%GNTE  | CASSRGNTEAFF  | TRBV12-4 | TRBJ1-1 | CILRDSGYSTLTF  | TRAV26-2 | TRAJ11 | Pt-08               |
| 689 | S%GNTE  | CASSDGNTEAFF  | TRBV11-3 | TRBJ1-1 | CAVRTGNQFYF    | TRAV8-3  | TRAJ49 | Pt-02               |
| 708 | S%SDT   | CASSLSDTQYF   | TRBV5-1  | TRBJ2-3 | CALSTQAAGNKLTF | TRAV9-2  | TRAJ17 | Pt-08               |
| 708 | S%SDT   | CASSTSDTQYF   | TRBV25-1 | TRBJ2-3 | NA             | NA       | NA     | GLCTLVAML_BMLF1_EBV |

**Supplemental Table 5.** Primer sequences for HLA class I typing

| Primer Name | Restriction site<br>(HindIII or BamHI) | Index      | Target specific sequence | Final sequence (5' - 3')                    |
|-------------|----------------------------------------|------------|--------------------------|---------------------------------------------|
| PCR1_fwd-1  | TACGCCAAGCTT                           | ACGAGTGCGT | TGGCCCTGACCSAGACCTG      | TACGCCAAGCTTACGAGTGCGTTGGCCCTGACCSAGACCTG   |
| PCR1_fwd-2  | TACGCCAAGCTT                           | ACGCTCGACA | TGGCCCTGACCSAGACCTG      | TACGCCAAGCTTACGCTCGACATGGCCCTGACCSAGACCTG   |
| PCR1_fwd-3  | TACGCCAAGCTT                           | AGACGCACTC | TGGCCCTGACCSAGACCTG      | TACGCCAAGCTTAGACGCACTCTGGCCCTGACCSAGACCTG   |
| PCR1_fwd-4  | TACGCCAAGCTT                           | AGCACTGTAG | TGGCCCTGACCSAGACCTG      | TACGCCAAGCTTAGCACTGTAGTGGCCCTGACCSAGACCTG   |
| PCR1_fwd-5  | TACGCCAAGCTT                           | ATCAGACACG | TGGCCCTGACCSAGACCTG      | TACGCCAAGCTTATCAGACACGTGGCCCTGACCSAGACCTG   |
| PCR1_fwd-6  | TACGCCAAGCTT                           | ATATCGCGAG | TGGCCCTGACCSAGACCTG      | TACGCCAAGCTTATATCGCGAGTGGCCCTGACCSAGACCTG   |
| PCR1_fwd-7  | TACGCCAAGCTT                           | CGTGTCTCTA | TGGCCCTGACCSAGACCTG      | TACGCCAAGCTTCGTGTCTCTATGGCCCTGACCSAGACCTG   |
| PCR1_fwd-8  | TACGCCAAGCTT                           | CTCGCGTGTG | TGGCCCTGACCSAGACCTG      | TACGCCAAGCTTCTCGCGTGTCTGGCCCTGACCSAGACCTG   |
| PCR1_rev    | ACCCGGGGATCC                           | -          | GKCTCGCTCTGGTTGTAGT      | ACCCGGGGATCCGKCTCGCTCTGGTTGTAGT             |
| PCR2_fwd-1  | TACGCCAAGCTT                           | TAGTATCAGC | ACTACAACCAGAGCGAGGMC     | TACGCCAAGCTTTAGTATCAGCACTACAACCAGAGCGAGGMC  |
| PCR2_fwd-2  | TACGCCAAGCTT                           | TCTCTATGCG | ACTACAACCAGAGCGAGGMC     | TACGCCAAGCTTTCTCTATGCGACTACAACCAGAGCGAGGMC  |
| PCR2_fwd-3  | TACGCCAAGCTT                           | TGATACGTCT | ACTACAACCAGAGCGAGGMC     | TACGCCAAGCTTTGATACGTCTACTACAACCAGAGCGAGGMC  |
| PCR2_fwd-4  | TACGCCAAGCTT                           | TACTGAGCTA | ACTACAACCAGAGCGAGGMC     | TACGCCAAGCTTTACTGAGCTAACTACAACCAGAGCGAGGMC  |
| PCR2_fwd-5  | TACGCCAAGCTT                           | CATAGTAGTG | ACTACAACCAGAGCGAGGMC     | TACGCCAAGCTTCATAGTAGTGACTACAACCAGAGCGAGGMC  |
| PCR2_fwd-6  | TACGCCAAGCTT                           | CGAGAGATAC | ACTACAACCAGAGCGAGGMC     | TACGCCAAGCTTCGAGAGATACACTACAACCAGAGCGAGGMC  |
| PCR2_fwd-7  | TACGCCAAGCTT                           | ATACGACGTA | ACTACAACCAGAGCGAGGMC     | TACGCCAAGCTTATACGACGTA ACTACAACCAGAGCGAGGMC |
| PCR2_fwd-8  | TACGCCAAGCTT                           | TCACGTACTA | ACTACAACCAGAGCGAGGMC     | TACGCCAAGCTTTCACGTACTAACTACAACCAGAGCGAGGMC  |
| PCR2_rev    | ACCCGGGGATCC                           | -          | TGCCAGGTCAGTGTGATCTC     | ACCCGGGGATCCGCCAGGTCAGTGTGATCTC             |
